# Supplementary material for: Direct and Indirect Effects of Planting Density, Nitrogenous Fertilizer and Host Plant Resistance on Rice Herbivores and Their Natural Enemies
Source: MDPI journal article supplement (doi:10.3390/agriculture12122053), 2022-11-30
Supplement: s1 [file s1]

# Direct and Indirect Effects of Planting Density, Nitrogenous Fertilizer and Host Plant Resistance on Rice Herbivores and Their Natural Enemies

Finbarr G. Horgan <sup>1,2,3,\*</sup>, Eduardo Crisol-Martínez <sup>1,2,4</sup>, Alexander M. Stuart <sup>5,6</sup>, James M. Villegas <sup>5,7</sup>, Ainara Peñalver-Cruz <sup>5,8</sup>, Enrique A. Mundaca <sup>2</sup>, Marivic O. Perez <sup>5</sup>, Carmencita C. Bernal <sup>5</sup>, Maria Liberty P. Almazan <sup>5</sup> and Angelee F. Ramal <sup>9</sup>

<sup>1</sup> EcoLaVerna Integral Restoration Ecology, Bridestown, Kildinan, T56 P499 County Cork, Ireland

<sup>2</sup> Escuela de Agronomía, Facultad de Ciencias Agrarias y Forestales, Universidad Católica del Maule, Casilla 7-D, Curicó 3349001, Chile

<sup>3</sup> Centre for Pesticide Suicide Prevention, University/BHF Centre for Cardiovascular Science, University of Edinburgh, Edinburgh EH16 4TJ, UK

<sup>4</sup> COEXPHAL (Association of Vegetable and Fruit Growers of Almeria), Carretera de Ronda 11, 04004 Almeria, Spain

<sup>5</sup> International Rice Research Institute, Makati 1226, Metro Manila, Philippines

<sup>6</sup> Pesticide Action Network UK, The Brighthelm Centre, North Road, Brighton BN1 1YD, UK

<sup>7</sup> Louisiana State University–Dean Lee Research Station, 8105 Tom Bowman Drive Alexandria, LA 71302, USA

<sup>8</sup> Instituto de Investigación y Tecnología Agroalimentaria (IRTA)-Escola Tècnica Superior d'Enginyeria Agrària (ETSEA), Protecció Vegetal Sostenible, av. Rovira Roure 191, 25198 Lleida, Spain

<sup>9</sup> School of Environmental Science and Management, University of the Philippines, Los Baños, 4030 Laguna, Philippines

\* Correspondence: f.horgan@ecolaverna.org

**Table S1.** Planthoppers and leafhoppers captured during blow-vac sampling in the dry and wet seasons according to subplot variety, transplanting density and nitrogen levels.

| Variety <sup>1</sup>           | IR62 | IR62 | IR62 | IR64 | IR64 | IR64 | IR62 | IR62 | IR62 | IR64 | IR64 | IR64 |
|--------------------------------|------|------|------|------|------|------|------|------|------|------|------|------|
| Density <sup>2</sup>           | HD   | HD   | HD   | HD   | HD   | HD   | LD   | LD   | LD   | LD   | LD   | LD   |
| Nitrogen <sup>3</sup>          | 0    | 60   | 150  | 0    | 60   | 150  | 0    | 60   | 150  | 0    | 60   | 150  |
| <b>Dry season</b>              |      |      |      |      |      |      |      |      |      |      |      |      |
| <i>Cicadulina bipunctata</i>   |      |      |      |      |      | 1    |      |      |      |      |      |      |
| <i>Cofana spectra</i>          |      |      |      |      | 1    |      |      |      | 1    |      |      |      |
| <i>Nephotettix malayanus</i>   |      |      |      |      |      |      |      | 1    |      |      | 1    |      |
| <i>Nephotettix nigropictus</i> | 1    | 5    | 2    | 2    | 6    | 9    |      |      |      | 1    | 3    | 3    |
| <i>Nephotettix viriscens</i>   | 28   | 30   | 17   | 87   | 72   | 56   | 23   | 12   | 18   | 69   | 50   | 53   |
| <i>Recilia dorsalis</i>        |      |      | 1    |      | 2    | 1    |      | 1    |      | 1    | 1    | 1    |
| <i>Scaphoideus morosus</i>     |      |      |      |      |      |      |      |      | 1    |      |      |      |
| <i>Nilaparvata lugens</i>      | 27   | 36   | 48   | 28   | 57   | 111  |      | 14   | 1    | 3    | 4    |      |
| <i>Sogatella furcifera</i>     | 28   | 26   | 73   | 59   | 140  | 152  | 88   | 142  | 192  | 84   | 208  | 245  |
| <i>Sogatella kolophon</i>      |      |      |      | 1    |      |      |      |      |      |      |      |      |
| <i>Tagosodes</i> sp 1          |      | 1    | 3    | 2    | 3    | 2    |      | 3    | 1    |      |      | 1    |
| Total                          | 84   | 98   | 144  | 179  | 281  | 332  | 111  | 173  | 214  | 158  | 267  | 303  |
| Species richness               | 4    | 5    | 6    | 6    | 7    | 7    | 2    | 6    | 6    | 5    | 6    | 5    |
| <b>Wet season</b>              |      |      |      |      |      |      |      |      |      |      |      |      |
| <i>Balclutha</i> sp.           |      |      |      |      |      |      |      |      | 1    |      |      | 1    |
| <i>Cicadulina bipunctata</i>   | 1    | 2    | 2    | 3    | 1    | 3    | 5    |      | 1    | 2    | 1    |      |
| <i>Cofana spectra</i>          |      | 1    |      | 3    | 1    | 2    |      |      |      | 1    | 1    | 1    |
| <i>Empoasca</i> sp.            |      |      |      |      |      |      |      |      |      | 1    |      |      |
| <i>Hortensia</i> sp.           |      |      |      |      |      |      |      | 1    |      | 1    |      |      |
| <i>Nephotettix malayanus</i>   | 7    |      | 4    | 5    | 1    | 4    | 3    | 2    | 2    | 6    | 2    |      |
| <i>Nephotettix nigropictus</i> | 13   | 15   | 18   | 53   | 37   | 28   | 19   | 30   | 12   | 33   | 21   | 47   |
| <i>Nephotettix viriscens</i>   | 38   | 27   | 63   | 75   | 82   | 56   | 51   | 109  | 71   | 62   | 31   | 63   |
| <i>Nephotettix</i> sp.         |      |      |      |      |      |      |      | 1    | 1    | 1    |      | 1    |

|                                        |     |     |     |     |     |     |     |     |     |     |     |     |
|----------------------------------------|-----|-----|-----|-----|-----|-----|-----|-----|-----|-----|-----|-----|
| <i>Recilia dorsalis</i>                | 3   | 4   | 2   | 6   | 7   | 18  | 5   | 6   | 4   | 4   | 4   | 4   |
| Unidentified                           |     |     |     |     |     |     |     |     |     |     |     | 1   |
| <i>Zyginidia</i> sp.                   |     |     |     | 1   |     |     |     |     |     | 1   | 1   | 5   |
| <i>Nilaparvata bakeri</i>              |     |     | 2   |     |     |     |     |     |     |     |     |     |
| <i>Nilaparvata lugens</i>              | 10  | 40  | 92  | 53  | 68  | 116 | 44  | 22  | 44  | 42  | 62  | 57  |
| <i>Sogatella furcifera</i>             | 142 | 89  | 88  | 209 | 151 | 176 | 116 | 266 | 148 | 162 | 96  | 125 |
| <i>Sogatella kolophon</i>              |     |     |     | 2   | 1   | 1   | 2   |     |     | 2   | 1   | 1   |
| <i>Tagosodes</i> sp 1                  |     | 15  | 2   | 2   | 3   | 8   | 2   | 2   | 2   | 4   | 4   | 1   |
| <i>Tagosodes pusanus</i>               | 1   |     |     | 1   | 1   | 1   |     | 2   |     | 3   | 2   | 1   |
| <i>Nisia</i> sp. (near) <i>nervosa</i> |     |     | 3   |     |     |     |     | 1   |     |     | 1   |     |
| Total                                  | 213 | 192 | 274 | 411 | 351 | 409 | 245 | 439 | 283 | 320 | 223 | 303 |
| Species richness                       | 8   | 8   | 10  | 12  | 11  | 11  | 9   | 11  | 10  | 15  | 13  | 13  |

<sup>1</sup>: IR62 is resistant to planthoppers and leafhoppers; <sup>2</sup>: HD = high-density planting (10 × 10cm), LD = low-density planting; <sup>3</sup>: 0 = 0 N added, 60 = 60 Kg N added ha<sup>-1</sup>, 150 = 150 Kg N added ha<sup>-1</sup>

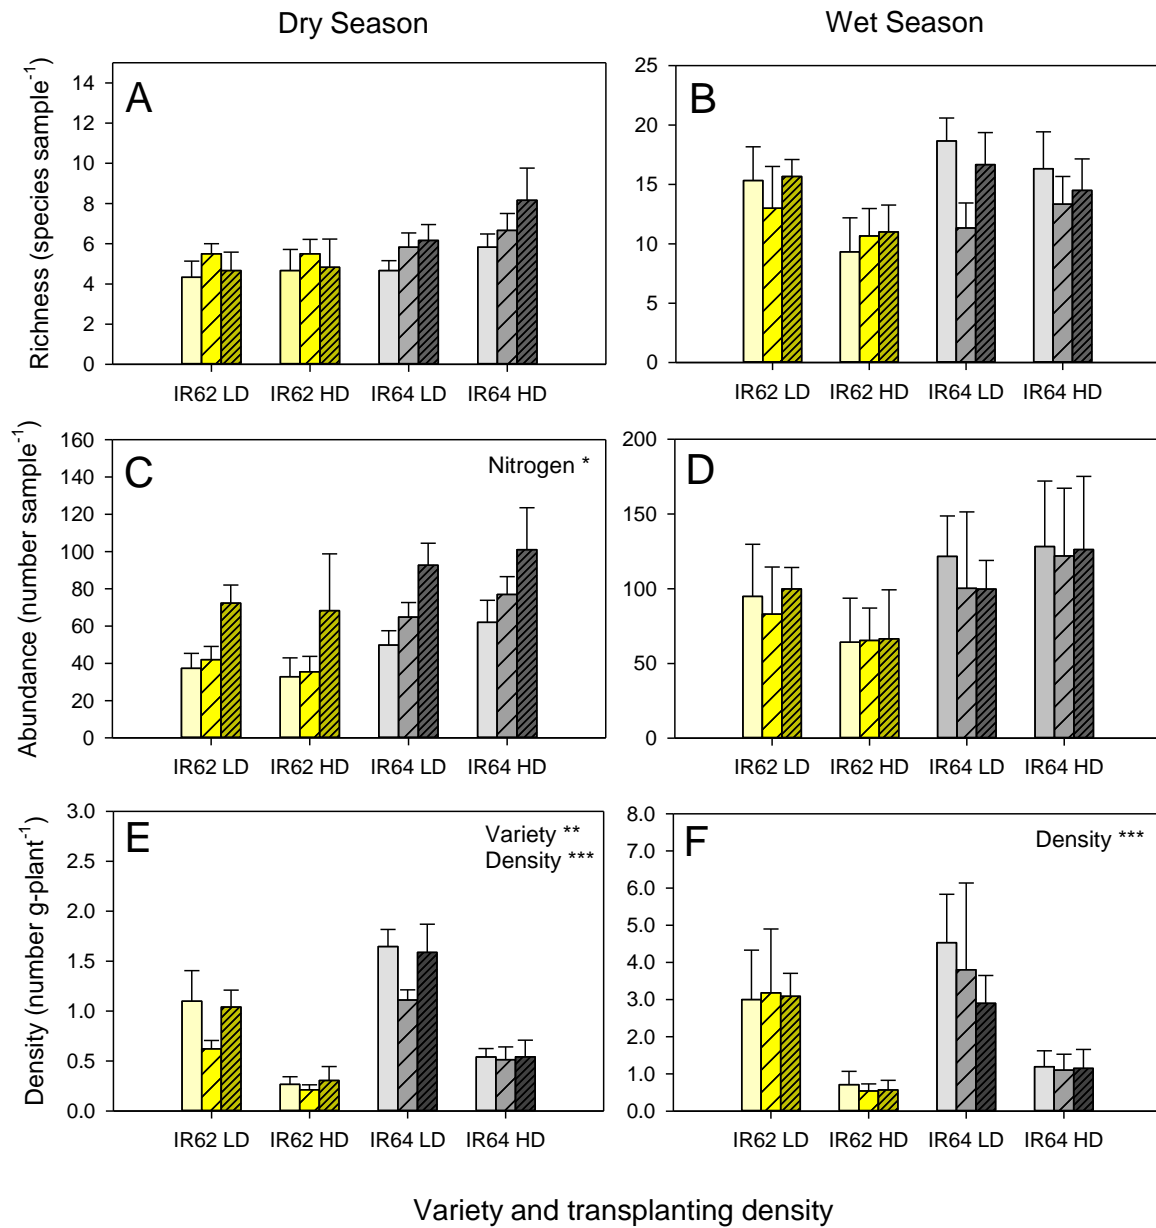

**Figure S1.** Species richness (A,B), abundance (C,D) and density (E,F) of herbivores (all species combined) in rice plots with resistant (IR62: yellow bars) and susceptible (IR64: grey bars) rice transplanted at low (LD) and high (HD) densities under varying nitrogen fertilizer treatments. Nitrogen was applied at 0 Kg ha<sup>-1</sup> (open bars), 60 Kg ha<sup>-1</sup> (hatched bars) and 150 Kg ha<sup>-1</sup> (densely hatched bars). Factors that significantly affected herbivore parameters are presented with significance levels as \*\* =  $p \leq 0.01$  and \*\*\* =  $p \leq 0.005$ . Sampling was conducted during the dry (A,C,E) and wet (B,D,F) seasons using blow-vac samplers. Standard errors are indicated ( $N = 6$ ).

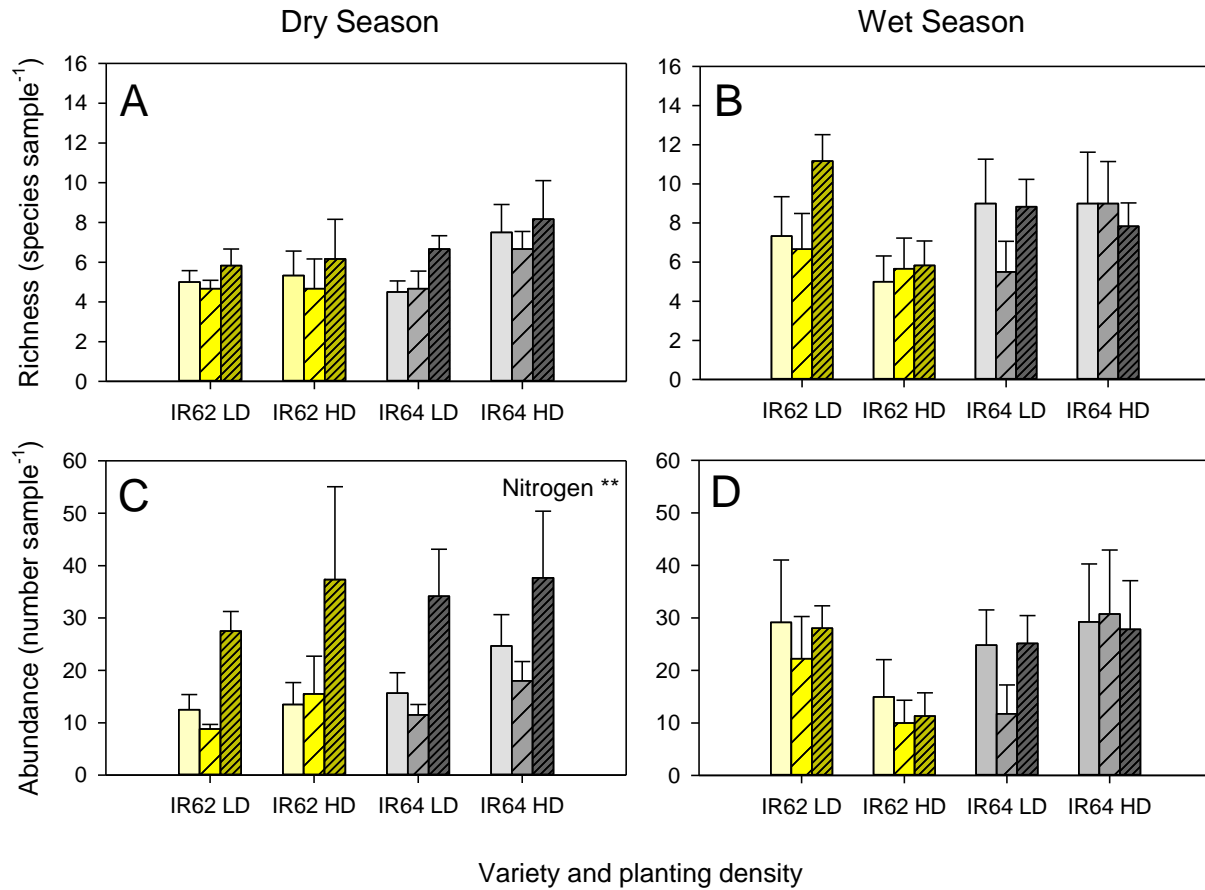

**Figure S2.** Species richness (A,B) and abundance (C,D) of decomposers (all species combined) in rice plots with resistant (IR62: yellow bars) and susceptible (IR64: grey bars) rice transplanted at low (LD) and high (HD) densities under varying nitrogen fertilizer treatments. Nitrogen was applied at 0 Kg ha<sup>-1</sup> (open bars), 60 Kg ha<sup>-1</sup> (hatched bars) and 150 Kg ha<sup>-1</sup> (densely-hatched bars). Factors that significantly affected decomposer parameters are presented with significance levels as \*\* =  $p \leq 0.01$ . Sampling was conducted during the dry (A,C) and wet (B,D) seasons using blowvac samplers. Standard errors are indicated ( $N = 6$ ).

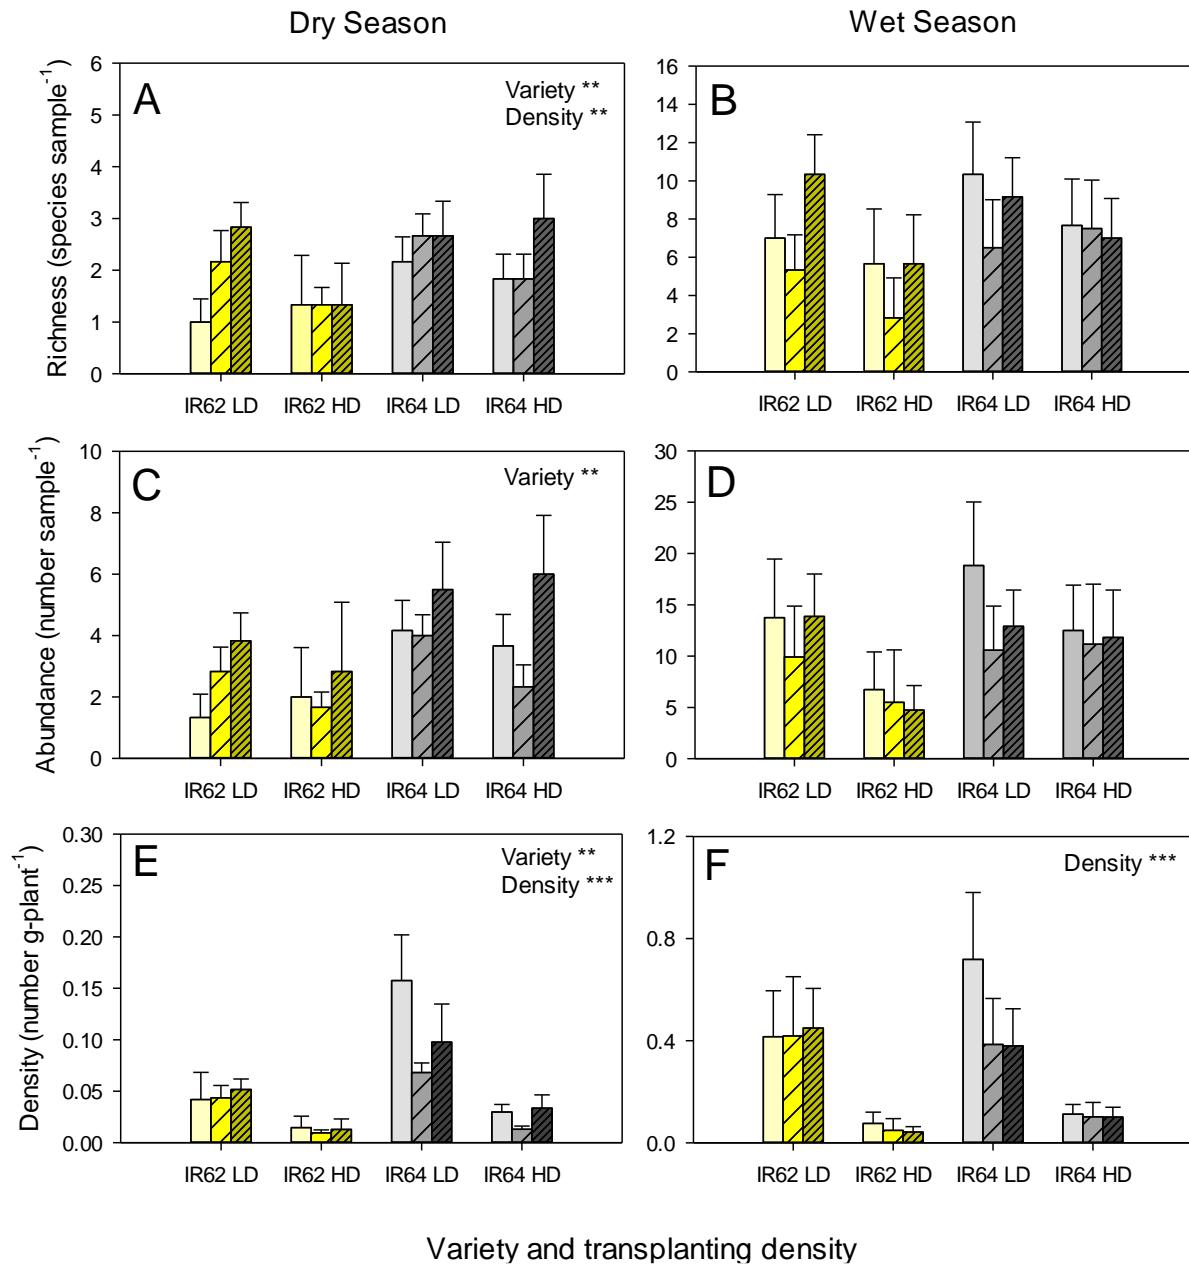

**Figure S3.** Species richness (A,B), abundance (C,D) and density (E,F) of free-living parasitoids in rice plots with resistant (IR62: yellow bars) and susceptible (IR64: grey bars) rice transplanted at low (LD) and high (HD) densities under varying nitrogen fertilizer treatments. Nitrogen was applied at 0 Kg ha<sup>-1</sup> (open bars), 60 Kg ha<sup>-1</sup> (hatched bars) and 150 Kg ha<sup>-1</sup> (densely-hatched bars). Factors that significantly affected parasitoid parameters are presented with significance levels as \*\* =  $p \leq 0.01$  and \*\*\* =  $p \leq 0.005$ . Sampling was conducted during the dry (A,C,E) and wet (B,D,F) seasons using blow-vac samplers. Standard errors are indicated (N = 6).

**Table S2.** Abundant rice herbivores (other than planthoppers and leafhoppers) and natural enemies captured during blow-vac sampling in the dry and wet seasons according to subplot variety, transplanting density and nitrogen levels.

| Variety <sup>1</sup>                   | IR62 | IR62 | IR62 | IR64 | IR64 | IR64 | IR62 | IR62 | IR62 | IR64 | IR64 | IR64 |
|----------------------------------------|------|------|------|------|------|------|------|------|------|------|------|------|
| Density <sup>2</sup>                   | HD   | HD   | HD   | HD   | HD   | HD   | LD   | LD   | LD   | LD   | LD   | LD   |
| Nitrogen <sup>3</sup>                  | 0    | 60   | 150  | 0    | 60   | 150  | 0    | 60   | 150  | 0    | 60   | 150  |
| <b>Dry Season</b>                      |      |      |      |      |      |      |      |      |      |      |      |      |
| <b>Herbivores</b>                      |      |      |      |      |      |      |      |      |      |      |      |      |
| <i>Hydrellia philippina</i>            | 2    | 1    | 1    |      | 6    | 2    |      |      | 3    |      | 2    | 2    |
| <i>Aphididae</i>                       | 18   | 3    | 26   | 29   | 17   | 15   | 24   | 3    | 28   | 32   | 11   | 16   |
| <i>Stenchaetothrips biformis</i>       | 9    | 10   | 7    | 10   | 40   | 13   | 7    | 15   | 18   | 8    | 34   | 18   |
| <i>Aleurocybotus sp</i>                | 1    | 6    | 5    | 3    | 6    | 10   |      | 3    | 1    | 3    | 5    | 4    |
| <b>Natural enemies</b>                 |      |      |      |      |      |      |      |      |      |      |      |      |
| <i>Trichomalopsis apanteloctena</i>    | 1    | 1    | 1    | 2    | 1    | 10   |      | 1    | 3    | 1    |      | 4    |
| <i>Telenomus dignus</i>                |      | 2    |      |      | 1    | 1    | 1    | 1    | 1    |      |      | 1    |
| <i>Telenomus rowani</i>                |      |      |      |      |      |      |      |      |      | 2    |      |      |
| <i>Tetrastichus sp.</i>                | 1    |      | 2    | 1    | 1    |      | 3    | 5    | 4    | 7    | 8    | 7    |
| <i>Trichogramma japonicum</i>          | 1    |      |      |      |      |      |      |      |      | 1    | 1    |      |
| <i>Anagrus flaveolus</i>               |      |      |      |      |      | 2    |      |      |      | 1    | 1    | 1    |
| <i>Anagrus optabilis</i>               |      |      |      |      |      | 1    | 1    | 1    | 1    | 1    |      |      |
| <i>Gonatocerus sp.</i>                 | 5    | 3    | 8    | 14   | 9    | 13   | 2    | 7    | 7    | 12   | 8    | 12   |
| <i>Oligosita aesopi</i>                | 2    | 3    | 3    | 4    | 1    | 4    |      | 2    | 5    |      | 4    | 5    |
| <i>Solenopsis geminata</i>             |      |      |      |      | 2    |      |      |      |      |      |      |      |
| <i>Microcanthia ornatula</i>           | 3    | 2    | 5    | 8    | 3    | 7    | 3    | 3    |      | 4    |      | 2    |
| <i>Cyrtorhinus lividipennis</i>        |      | 2    |      |      | 1    | 9    |      |      |      |      |      | 1    |
| <i>Micraspis crocea</i>                | 1    | 4    | 2    | 3    | 15   | 9    |      | 3    | 4    | 1    | 4    | 1    |
| <i>Mesoveliidae</i>                    | 8    | 6    | 5    | 4    | 1    | 3    | 9    | 3    | 2    | 1    | 0    | 3    |
| <i>Mesovelia vittigera</i>             | 11   | 13   | 20   | 13   | 28   | 30   | 3    | 5    | 4    | 6    | 15   | 13   |
| <i>Microvelia douglasi atrolineata</i> | 14   | 20   | 22   | 15   | 22   | 32   | 10   | 10   | 0    | 6    | 9    | 11   |
| <i>Micronecta sp.</i>                  | 46   | 4    | 90   | 5    | 4    | 46   | 14   | 1    |      | 15   | 1    | 22   |
| <i>Araneus inustus</i>                 |      |      |      |      |      | 1    |      | 1    |      |      |      |      |
| <i>Salticidae (adult)</i>              |      |      | 3    |      |      | 1    |      |      |      | 1    | 1    | 3    |
| <i>Atypena formosana</i>               | 5    | 2    | 3    | 7    | 5    | 6    | 5    | 2    | 2    | 5    | 3    | 7    |
| <i>Pardosa pseudoannulata</i>          | 8    | 5    | 5    | 10   | 9    | 10   | 13   | 3    | 6    | 19   | 10   | 8    |
| <i>Dyschiriognatha sp</i>              | 2    |      |      | 5    | 3    | 8    |      | 1    |      | 4    | 5    | 7    |
| <i>Tetragnatha mandibulata</i>         | 1    |      | 3    |      |      | 2    |      |      | 2    |      | 1    | 3    |
| <i>Tetragnatha javana</i>              |      | 1    | 1    | 2    |      | 1    |      |      |      |      | 2    | 1    |
| <i>Tetragnatha maxillosa</i>           | 7    | 5    | 2    | 9    | 11   | 3    | 8    | 4    | 1    | 11   | 3    | 1    |
| <i>Tetragnatha viriscens</i>           | 18   | 53   | 12   | 35   | 36   | 11   | 29   | 34   | 11   | 22   | 17   | 6    |
| <b>Wet Season</b>                      |      |      |      |      |      |      |      |      |      |      |      |      |
| <b>Herbivores</b>                      |      |      |      |      |      |      |      |      |      |      |      |      |
| <i>Rivula atimeta</i>                  | 1    |      |      | 2    | 3    | 1    | 2    | 2    | 4    | 4    | 3    | 1    |
| <i>Naranga aenescens</i>               | 1    | 2    | 1    | 2    | 2    | 4    | 3    | 2    | 3    | 2    |      | 3    |
| <i>Parnara guttata</i>                 |      |      |      |      |      |      |      |      |      |      |      | 1    |
| <i>Pyralidae (larva)</i>               |      |      |      |      |      |      |      |      |      |      |      | 1    |

|                                        |    |    |    |    |     |     |    |    |    |    |    |    |
|----------------------------------------|----|----|----|----|-----|-----|----|----|----|----|----|----|
| <i>Marasmia patnalis</i>               |    |    |    |    | 1   |     |    |    | 1  |    |    |    |
| Papilionidae (larva)                   |    |    | 1  |    | 1   |     | 1  |    | 2  | 1  | 1  | 3  |
| <i>Cnaphalocrosis medinalis</i>        | 1  |    | 1  | 1  | 3   | 4   |    |    |    | 2  |    |    |
| <i>Chilo suppressalis</i>              | 4  |    |    |    |     |     | 1  | 2  | 1  | 1  | 1  |    |
| <i>Scirpophaga incertulas</i>          |    |    | 1  | 1  | 2   |     |    | 1  |    | 1  |    |    |
| <i>Agromyza oryzae</i>                 |    |    | 3  | 5  | 5   | 3   | 2  | 3  | 10 | 5  | 3  | 5  |
| <i>Anthomyiidae</i>                    | 1  | 2  | 2  | 8  | 7   | 4   | 5  | 1  | 4  | 4  | 2  | 6  |
| <i>Chlorops</i> sp.                    | 7  | 2  | 6  | 6  | 12  | 3   | 8  | 9  | 5  | 13 | 8  | 10 |
| <i>Hydrellia griseola</i>              | 1  | 3  |    | 1  | 1   | 1   | 1  | 1  | 1  | 1  |    |    |
| <i>Hydrellia philippina</i>            | 9  | 4  | 3  | 10 | 8   | 14  | 6  | 10 | 7  | 4  | 14 | 11 |
| Aphididae                              |    |    | 2  | 8  |     | 2   | 2  | 1  |    | 1  | 1  | 3  |
| <i>Stenchaetothrips biformis</i>       | 32 | 24 | 17 | 50 | 38  | 19  | 34 | 21 | 32 | 71 | 37 | 42 |
| <i>Aleurocybotus</i> sp.               | 21 | 5  | 15 | 67 | 104 | 108 | 66 | 37 | 67 | 72 | 15 | 45 |
| <b>Natural enemies</b>                 |    |    |    |    |     |     |    |    |    |    |    |    |
| <i>Trichomalopsis apanteloctena</i>    | 1  |    |    | 3  | 3   | 2   | 1  | 1  | 1  | 2  | 1  |    |
| <i>Telenomus</i> sp.                   | 3  | 1  | 2  |    |     |     | 3  | 3  | 4  | 1  | 1  | 4  |
| <i>Telenomus dignus</i>                |    |    | 1  | 3  | 4   | 2   | 2  | 3  | 2  | 7  | 3  | 3  |
| <i>Telenomus rowani</i>                | 2  | 1  | 3  | 2  | 3   | 3   | 4  | 3  | 5  | 2  | 4  | 6  |
| <i>Tetrastichus</i> sp.                | 4  | 3  | 3  | 1  | 2   | 2   | 2  | 2  | 2  | 2  | 1  | 1  |
| <i>Trichogramma japonicum</i>          | 1  |    | 2  | 9  | 11  | 7   | 16 | 8  | 12 | 14 | 9  | 7  |
| <i>Anagrus flaveolus</i>               | 1  |    |    |    | 2   | 2   | 1  | 1  | 1  | 7  | 3  | 2  |
| <i>Anagrus optabilis</i>               |    | 1  |    | 4  | 3   | 4   | 1  | 1  | 2  | 3  | 3  | 2  |
| <i>Gonatocerus</i> sp.                 | 10 | 12 | 5  | 9  | 10  | 8   | 15 | 18 | 19 | 13 | 7  | 13 |
| <i>Oligosita aesopi</i>                | 5  | 8  | 6  | 27 | 17  | 25  | 26 | 9  | 17 | 38 | 17 | 19 |
| <i>Solenopsis geminata</i>             | 5  | 1  | 2  | 8  | 2   | 2   | 10 | 1  | 2  | 4  | 3  | 3  |
| <i>Microcanthia ornatula</i>           |    |    |    |    |     |     |    |    |    |    |    |    |
| <i>Cyrtorhinus lividipennis</i>        |    | 1  | 2  | 6  | 7   | 5   | 4  | 3  | 1  | 3  | 2  | 1  |
| <i>Micraspis crocea</i>                | 2  |    | 3  | 7  | 4   | 10  | 3  | 2  | 3  | 5  | 4  | 8  |
| Mesoveliidae                           | 1  |    | 1  |    | 1   |     |    |    |    |    |    |    |
| <i>Mesovelia vittigera</i>             | 1  |    | 2  |    | 1   |     | 1  | 1  |    | 1  | 3  | 1  |
| <i>Microvelia douglasi atrolineata</i> |    |    | 4  |    | 4   | 5   | 2  | 4  |    | 8  | 2  | 2  |
| <i>Micronecta</i> sp.                  |    |    |    |    |     |     | 2  |    |    |    | 1  |    |
| <i>Araneus inustus</i>                 | 5  |    | 5  | 4  | 2   | 8   | 1  | 7  | 7  | 3  | 10 | 3  |
| Salticidae (adult)                     | 1  | 2  |    | 7  | 10  | 3   | 3  | 2  | 13 | 6  | 1  | 5  |
| <i>Atypena formosana</i>               |    |    | 2  |    | 1   | 1   | 2  | 1  | 1  | 2  | 2  |    |
| <i>Pardosa pseudoannulata</i>          | 5  | 8  | 7  | 8  | 7   | 5   | 8  | 6  | 2  | 7  | 11 | 6  |
| <i>Dyschiriognatha</i> sp.             | 2  | 2  | 1  | 1  | 1   | 1   | 1  |    |    |    | 1  |    |
| <i>Tetragnatha mandibulata</i>         | 4  |    | 1  | 2  | 1   | 3   | 3  | 1  | 7  | 1  | 1  | 1  |
| <i>Tetragnatha javana</i>              | 2  | 2  | 2  | 10 | 7   | 9   | 4  | 8  | 10 | 4  | 4  | 12 |
| <i>Tetragnatha maxillosa</i>           | 11 | 12 | 6  | 16 | 13  | 11  | 14 | 6  | 16 | 15 | 15 | 19 |
| <i>Tetragnatha viriscens</i>           | 25 | 38 | 12 | 33 | 21  | 28  | 21 | 11 | 41 | 25 | 29 | 27 |

<sup>1</sup>: IR62 is resistant to planthoppers and leafhoppers; <sup>2</sup>: HD = high density planting (10 × 10cm), LD = low-density planting; <sup>3</sup>: 0 = 0 N added, 60 = 60 Kg N added ha<sup>-1</sup>, 150 = 150 Kg N added ha<sup>-1</sup>

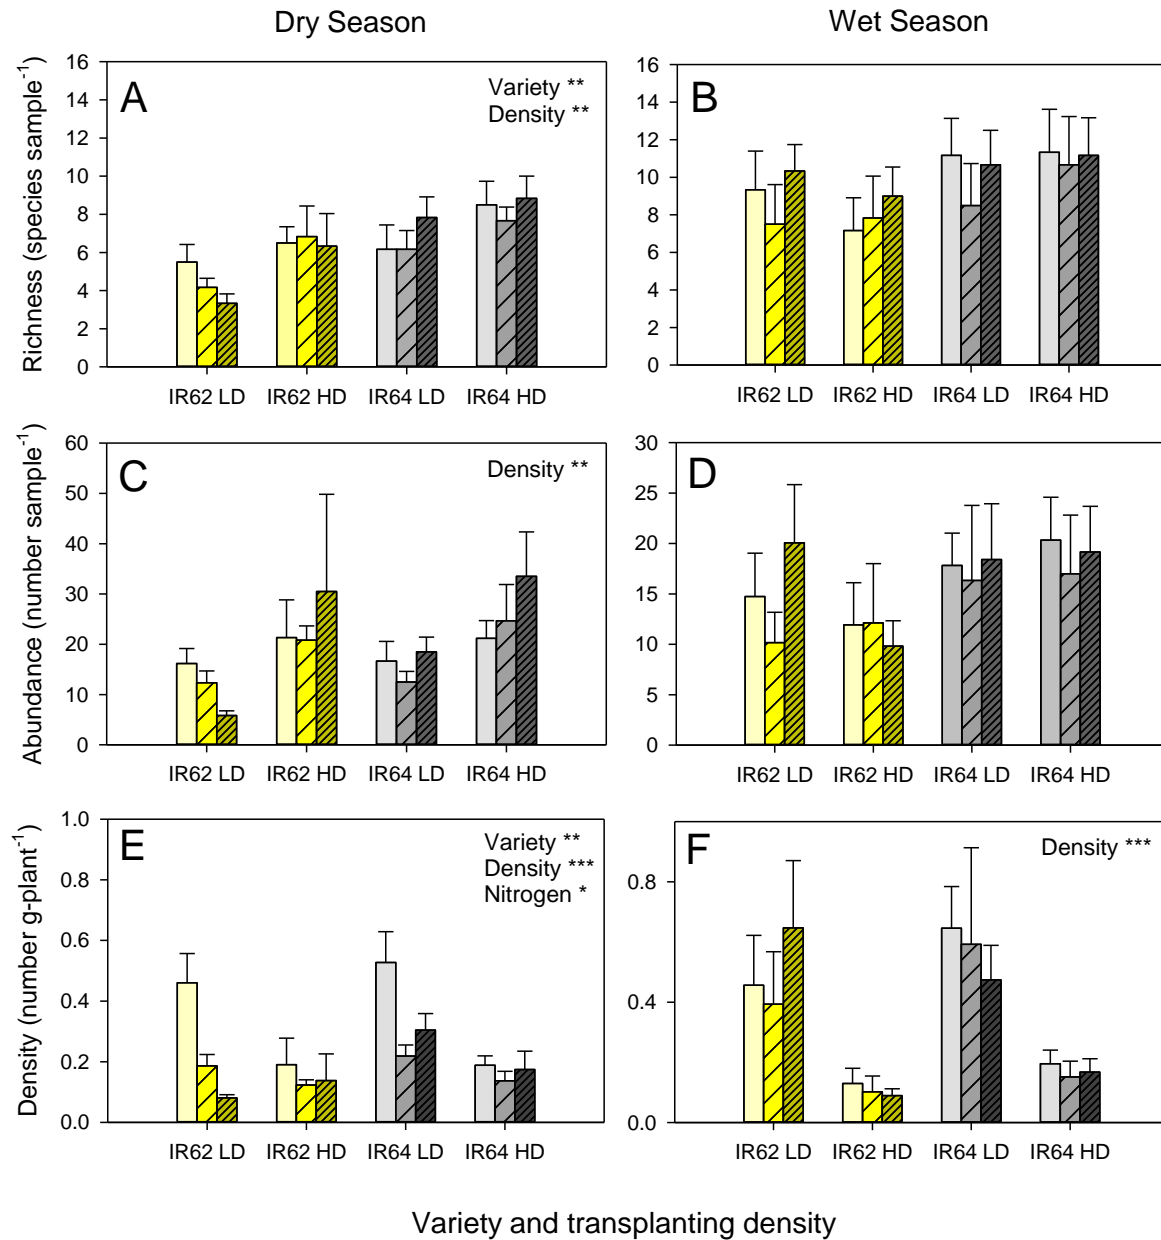

**Figure S4.** Species richness (A,B), abundance (C,D) and density (E,F) of all predators (excluding parasitoids) in rice plots with resistant (IR62: yellow bars) and susceptible (IR64: grey bars) rice transplanted at low (LD) and high (HD) densities under varying nitrogen fertilizer treatments. Nitrogen was applied at 0 Kg ha<sup>-1</sup> (open bars), 60 Kg ha<sup>-1</sup> (hatched bars) and 150 Kg ha<sup>-1</sup> (densely-hatched bars). Factors that significantly affected predator parameters are presented with significance levels as \* =  $p \leq 0.05$ , \*\* =  $p \leq 0.01$  and \*\*\* =  $p \leq 0.005$ . Sampling was conducted during the dry (A,C,E) and wet (B,D,F) seasons using blow-vac samplers. Standard errors are indicated ( $N = 6$ ).

### *Notes on predators*

During the DS, more predator species occurred in the IR64 plots ( $F_{1,71} = 9.20$ ,  $p = 0.008$ ) and at high transplanting density ( $F_{1,71} = 7.99$ ,  $p = 0.013$ ) (Figure S4). Predators were more abundant in the high-density plots ( $F_{1,71} = 7.92$ ,  $p = 0.013$ ), largely due to higher numbers of predatory Microvellidae and Mesovellidae bugs (LD =  $18.33 \pm 3.17$ , HD =  $44.50 \pm 5.12$ :  $F_{1,55} = 14.220$ ,  $p < 0.001$ ); however, this translated to lower predator densities in the same high-density rice stands ( $F_{1,71} = 12.70$ ,  $p = 0.003$ ) because of the higher biomass of plants per unit area. Predator densities were lower in the IR64 plots ( $F_{1,71} = 7.50$ ,  $p = 0.015$ ) and where nitrogen had been added (i.e., 60 and 150 Kg N ha<sup>-1</sup>:  $F_{2,71} = 5.43$ ,  $p = 0.025$ ) (Figure S4). Variety and nitrogen did not significantly affect species richness or abundance during the WS sampling, but predator densities were lower in the high-density rice stands ( $F_{1,71} = 27.52$ ,  $p < 0.001$ ) (Figure S4).

**Table S3.** Rice plant condition at harvest during the 2013 dry and wet seasons (see also Figure 9). Numbers and means  $\pm$  SEM.

| Variety                        | Density <sup>1</sup> | Nitrogen<br>(Kg ha <sup>-1</sup> ) | Tiller<br>Number <sup>3</sup> | Root<br>Weight (g<br>plant <sup>-1</sup> ) <sup>2,3</sup> | Shoot<br>Weight (g<br>plant <sup>-1</sup> ) <sup>2,3</sup> | Plant<br>Height<br>(cm) <sup>3</sup> | Number of<br>Filled Grain <sup>3</sup> | Weight<br>of 100<br>Filled<br>Grain (g) | Proportion<br>of Grain<br>Unfilled | Weight of<br>Filled<br>Grains (g<br>plant <sup>-1</sup> ) <sup>2,3</sup> | Root:Shoot<br>Ratio <sup>3</sup> |
|--------------------------------|----------------------|------------------------------------|-------------------------------|-----------------------------------------------------------|------------------------------------------------------------|--------------------------------------|----------------------------------------|-----------------------------------------|------------------------------------|--------------------------------------------------------------------------|----------------------------------|
| <b>Dry Season</b>              |                      |                                    |                               |                                                           |                                                            |                                      |                                        |                                         |                                    |                                                                          |                                  |
| IR62                           | LD                   | 0                                  | 11.84 $\pm$ 0.70 <sup>a</sup> | 1.81 $\pm$ 0.02                                           | 18.20 $\pm$ 0.27 <sup>a</sup>                              | 73.32 $\pm$ 0.78 <sup>a</sup>        | 682.06 $\pm$ 26.06 <sup>a</sup>        | 2.09 $\pm$ 0.02                         | 0.00 $\pm$ 0.00                    | 14.11 $\pm$ 0.53 <sup>a</sup>                                            | 0.05 $\pm$ 0.00 <sup>a</sup>     |
|                                | LD                   | 60                                 | 15.79 $\pm$ 0.99 <sup>b</sup> | 2.13 $\pm$ 0.10                                           | 21.47 $\pm$ 0.99 <sup>b</sup>                              | 81.62 $\pm$ 0.50 <sup>b</sup>        | 830.75 $\pm$ 52.85 <sup>ab</sup>       | 1.98 $\pm$ 0.01                         | 0.00 $\pm$ 0.00                    | 16.37 $\pm$ 1.01 <sup>b</sup>                                            | 0.06 $\pm$ 0.00 <sup>a</sup>     |
|                                | LD                   | 150                                | 18.78 $\pm$ 0.61 <sup>c</sup> | 2.10 $\pm$ 0.07                                           | 24.91 $\pm$ 0.79 <sup>c</sup>                              | 86.58 $\pm$ 0.69 <sup>c</sup>        | 1018.63 $\pm$ 38.41 <sup>b</sup>       | 2.04 $\pm$ 0.01                         | 0.00 $\pm$ 0.00                    | 20.57 $\pm$ 0.69 <sup>c</sup>                                            | 0.04 $\pm$ 0.00 <sup>b</sup>     |
|                                | HD                   | 0                                  | 8.06 $\pm$ 0.86 <sup>a</sup>  | 1.15 $\pm$ 0.03                                           | 10.74 $\pm$ 0.24 <sup>a</sup>                              | 71.29 $\pm$ 0.34 <sup>a</sup>        | 326.11 $\pm$ 8.62 <sup>a</sup>         | 2.05 $\pm$ 0.01                         | 0.01 $\pm$ 0.00                    | 6.66 $\pm$ 0.15 <sup>a</sup>                                             | 0.06 $\pm$ 0.00 <sup>a</sup>     |
|                                | HD                   | 60                                 | 8.95 $\pm$ 0.41 <sup>b</sup>  | 1.40 $\pm$ 0.04                                           | 13.94 $\pm$ 0.37 <sup>b</sup>                              | 75.58 $\pm$ 0.55 <sup>b</sup>        | 385.02 $\pm$ 4.57 <sup>ab</sup>        | 2.08 $\pm$ 0.02                         | 0.01 $\pm$ 0.00                    | 8.02 $\pm$ 0.11 <sup>b</sup>                                             | 0.06 $\pm$ 0.00 <sup>a</sup>     |
|                                | HD                   | 150                                | 10.43 $\pm$ 0.76 <sup>c</sup> | 1.49 $\pm$ 0.07                                           | 17.60 $\pm$ 0.78 <sup>c</sup>                              | 81.48 $\pm$ 0.47 <sup>c</sup>        | 533.06 $\pm$ 20.51 <sup>b</sup>        | 2.25 $\pm$ 0.01                         | 0.00 $\pm$ 0.00                    | 11.99 $\pm$ 0.47 <sup>c</sup>                                            | 0.05 $\pm$ 0.00 <sup>b</sup>     |
| IR64                           | LD                   | 0                                  | 13.28 $\pm$ 0.03 <sup>a</sup> | 2.01 $\pm$ 0.07                                           | 18.55 $\pm$ 0.63 <sup>a</sup>                              | 71.97 $\pm$ 0.40 <sup>a</sup>        | 563.68 $\pm$ 24.63 <sup>a</sup>        | 2.18 $\pm$ 0.02                         | 0.01 $\pm$ 0.00                    | 12.33 $\pm$ 0.58 <sup>a</sup>                                            | 0.06 $\pm$ 0.00 <sup>a</sup>     |
|                                | LD                   | 60                                 | 15.54 $\pm$ 0.04 <sup>b</sup> | 2.46 $\pm$ 0.09                                           | 24.44 $\pm$ 0.88 <sup>b</sup>                              | 80.05 $\pm$ 0.17 <sup>b</sup>        | 775.29 $\pm$ 28.51 <sup>ab</sup>       | 2.31 $\pm$ 0.01                         | 0.00 $\pm$ 0.00                    | 17.84 $\pm$ 0.61 <sup>b</sup>                                            | 0.06 $\pm$ 0.00 <sup>a</sup>     |
|                                | LD                   | 150                                | 18.28 $\pm$ 0.74 <sup>c</sup> | 2.17 $\pm$ 0.07                                           | 25.44 $\pm$ 0.87 <sup>c</sup>                              | 87.48 $\pm$ 0.68 <sup>c</sup>        | 832.75 $\pm$ 33.96 <sup>b</sup>        | 2.32 $\pm$ 0.02                         | 0.00 $\pm$ 0.00                    | 19.14 $\pm$ 0.74 <sup>c</sup>                                            | 0.05 $\pm$ 0.00 <sup>b</sup>     |
|                                | HD                   | 0                                  | 6.32 $\pm$ 0.53 <sup>a</sup>  | 1.30 $\pm$ 0.04                                           | 11.98 $\pm$ 0.34 <sup>a</sup>                              | 71.26 $\pm$ 0.75 <sup>a</sup>        | 315.15 $\pm$ 17.10 <sup>a</sup>        | 2.29 $\pm$ 0.01                         | 0.01 $\pm$ 0.00                    | 7.16 $\pm$ 0.36 <sup>a</sup>                                             | 0.06 $\pm$ 0.00 <sup>a</sup>     |
|                                | HD                   | 60                                 | 8.34 $\pm$ 0.47 <sup>b</sup>  | 1.45 $\pm$ 0.03                                           | 14.39 $\pm$ 0.28 <sup>b</sup>                              | 79.12 $\pm$ 0.33 <sup>b</sup>        | 382.31 $\pm$ 8.22 <sup>ab</sup>        | 2.40 $\pm$ 0.02                         | 0.01 $\pm$ 0.00                    | 9.17 $\pm$ 0.21 <sup>b</sup>                                             | 0.06 $\pm$ 0.00 <sup>a</sup>     |
|                                | HD                   | 150                                | 10.03 $\pm$ 0.39 <sup>c</sup> | 1.78 $\pm$ 0.05                                           | 20.70 $\pm$ 0.59 <sup>c</sup>                              | 86.28 $\pm$ 0.55 <sup>c</sup>        | 555.09 $\pm$ 22.44 <sup>b</sup>        | 2.44 $\pm$ 0.03                         | 0.01 $\pm$ 0.00                    | 13.35 $\pm$ 0.47 <sup>c</sup>                                            | 0.05 $\pm$ 0.00 <sup>b</sup>     |
| F-variety (1,71) <sup>4</sup>  |                      |                                    | 0.38                          | 2.55                                                      | 2.09                                                       | 0.079                                | 1.08                                   | 46.38***                                | 0.57                               | 0.16                                                                     | 2.00                             |
| F-density (1,71) <sup>4</sup>  |                      |                                    | 119.12***                     | 36.55***                                                  | 40.08***                                                   | 5.15*                                | 42.68***                               | 7.70**                                  | 5.71*                              | 51.06***                                                                 | 2.00                             |
| F-nitrogen (2,71) <sup>4</sup> |                      |                                    | 18.81**                       | 3.27                                                      | 13.77***                                                   | 43.92***                             | 7.30**                                 | 3.12                                    | 0.29                               | 13.58***                                                                 | 20.00***                         |
| <b>Wet Season</b>              |                      |                                    |                               |                                                           |                                                            |                                      |                                        |                                         |                                    |                                                                          |                                  |
| IR62                           | LD                   | 0                                  | 12.77 $\pm$ 0.23 <sup>a</sup> | 4.19 $\pm$ 0.21                                           | 27.29 $\pm$ 1.25 <sup>a</sup>                              | 83.22 $\pm$ 2.39 <sup>a</sup>        | 865.81 $\pm$ 23.49 <sup>a</sup>        | 2.26 $\pm$ 0.01                         | 0.00 $\pm$ 0.02                    | 19.68 $\pm$ 0.63 <sup>a</sup>                                            | 0.08 $\pm$ 0.00 <sup>a</sup>     |
|                                | LD                   | 60                                 | 12.95 $\pm$ 0.14 <sup>b</sup> | 3.35 $\pm$ 0.07                                           | 36.49 $\pm$ 1.02 <sup>b</sup>                              | 93.28 $\pm$ 2.89 <sup>a</sup>        | 1049.15 $\pm$ 25.60 <sup>b</sup>       | 2.24 $\pm$ 0.02                         | 0.00 $\pm$ 0.03                    | 23.49 $\pm$ 0.60 <sup>b</sup>                                            | 0.05 $\pm$ 0.00 <sup>b</sup>     |
|                                | LD                   | 150                                | 16.04 $\pm$ 0.14 <sup>b</sup> | 3.90 $\pm$ 0.21                                           | 44.12 $\pm$ 1.45 <sup>b</sup>                              | 100.72 $\pm$ 2.49 <sup>b</sup>       | 1321.52 $\pm$ 56.85 <sup>b</sup>       | 2.16 $\pm$ 0.02                         | 0.00 $\pm$ 0.04                    | 28.80 $\pm$ 1.35 <sup>c</sup>                                            | 0.05 $\pm$ 0.00 <sup>b</sup>     |
|                                | HD                   | 0                                  | 7.98 $\pm$ 0.12 <sup>a</sup>  | 2.36 $\pm$ 0.13                                           | 15.86 $\pm$ 0.71 <sup>a</sup>                              | 86.58 $\pm$ 4.39 <sup>a</sup>        | 477.28 $\pm$ 19.27 <sup>a</sup>        | 2.29 $\pm$ 0.02                         | 0.00 $\pm$ 0.00                    | 11.08 $\pm$ 0.53 <sup>a</sup>                                            | 0.08 $\pm$ 0.00 <sup>a</sup>     |
|                                | HD                   | 60                                 | 8.63 $\pm$ 0.26 <sup>b</sup>  | 1.91 $\pm$ 0.07                                           | 22.26 $\pm$ 0.48 <sup>b</sup>                              | 95.14 $\pm$ 5.53 <sup>a</sup>        | 572.04 $\pm$ 22.30 <sup>b</sup>        | 2.27 $\pm$ 0.02                         | 0.00 $\pm$ 0.00                    | 12.90 $\pm$ 0.49 <sup>b</sup>                                            | 0.05 $\pm$ 0.00 <sup>b</sup>     |
|                                | HD                   | 150                                | 8.79 $\pm$ 0.36 <sup>b</sup>  | 2.45 $\pm$ 0.12                                           | 19.91 $\pm$ 0.57 <sup>b</sup>                              | 99.64 $\pm$ 2.34 <sup>b</sup>        | 585.19 $\pm$ 21.68 <sup>b</sup>        | 2.33 $\pm$ 0.01                         | 0.00 $\pm$ 0.01                    | 13.67 $\pm$ 0.52 <sup>c</sup>                                            | 0.07 $\pm$ 0.00 <sup>b</sup>     |
| IR64                           | LD                   | 0                                  | 12.53 $\pm$ 0.22 <sup>a</sup> | 4.26 $\pm$ 0.18                                           | 26.28 $\pm$ 1.02 <sup>a</sup>                              | 78.69 $\pm$ 1.76 <sup>a</sup>        | 821.29 $\pm$ 23.97 <sup>a</sup>        | 2.41 $\pm$ 0.01                         | 0.00 $\pm$ 0.08                    | 19.84 $\pm$ 0.63 <sup>a</sup>                                            | 0.09 $\pm$ 0.00 <sup>a</sup>     |
|                                | LD                   | 60                                 | 11.92 $\pm$ 0.26 <sup>b</sup> | 4.26 $\pm$ 0.26                                           | 35.67 $\pm$ 1.27 <sup>b</sup>                              | 89.31 $\pm$ 2.53 <sup>a</sup>        | 1059.73 $\pm$ 54.91 <sup>b</sup>       | 2.44 $\pm$ 0.02                         | 0.00 $\pm$ 0.09                    | 25.57 $\pm$ 1.25 <sup>b</sup>                                            | 0.07 $\pm$ 0.00 <sup>b</sup>     |
|                                | LD                   | 150                                | 17.00 $\pm$ 0.26 <sup>b</sup> | 4.97 $\pm$ 0.26                                           | 41.36 $\pm$ 1.21 <sup>b</sup>                              | 87.94 $\pm$ 5.43 <sup>b</sup>        | 1137.21 $\pm$ 48.95 <sup>b</sup>       | 2.43 $\pm$ 0.01                         | 0.00 $\pm$ 0.10                    | 27.60 $\pm$ 1.18 <sup>c</sup>                                            | 0.07 $\pm$ 0.00 <sup>b</sup>     |
|                                | HD                   | 0                                  | 8.69 $\pm$ 0.40 <sup>a</sup>  | 2.50 $\pm$ 0.24                                           | 13.64 $\pm$ 0.87 <sup>a</sup>                              | 87.00 $\pm$ 2.06 <sup>a</sup>        | 360.63 $\pm$ 27.44 <sup>a</sup>        | 2.41 $\pm$ 0.01                         | 0.00 $\pm$ 0.05                    | 8.68 $\pm$ 0.67 <sup>a</sup>                                             | 0.11 $\pm$ 0.00 <sup>a</sup>     |

|                                |     |                        |           |                         |                         |                           |           |           |                         |                        |
|--------------------------------|-----|------------------------|-----------|-------------------------|-------------------------|---------------------------|-----------|-----------|-------------------------|------------------------|
| HD                             | 60  | 9.21±0.24 <sup>b</sup> | 2.29±0.06 | 20.36±0.48 <sup>b</sup> | 93.31±1.11 <sup>a</sup> | 508.84±30.20 <sup>b</sup> | 2.41±0.02 | 0.00±0.06 | 12.24±0.73 <sup>b</sup> | 0.07±0.00 <sup>b</sup> |
| HD                             | 150 | 9.08±0.13 <sup>b</sup> | 2.69±0.14 | 22.41±0.80 <sup>b</sup> | 94.39±1.18 <sup>b</sup> | 520.04±17.42 <sup>b</sup> | 2.41±0.01 | 0.00±0.07 | 12.59±0.45 <sup>c</sup> | 0.08±0.00 <sup>b</sup> |
| F-variety (1,71) <sup>4</sup>  |     | 1.12                   | 1.08      | 0.13                    | 5.08*                   | 1.62                      | 21.18***  | 2.40      | 0.98                    | 3.40                   |
| F-density (1,71) <sup>4</sup>  |     | 113.49***              | 29.22***  | 76.22***                | 3.41                    | 78.59***                  | 0.74      | 0.40      | 75.26***                | 0.85                   |
| F-nitrogen (2,71) <sup>4</sup> |     | 14.53***               | 0.73      | 12.40***                | 11.79***                | 6.25**                    | 0.02      | 0.00      | 5.84*                   | 5.53*                  |

<sup>1</sup>: LD = low density, HD = high density; <sup>2</sup>: All weights are presented as dry weights; <sup>3</sup>: Lower case letters indicate homogenous nitrogen groups based on Tukey pairwise comparisons ( $P > 0.05$ ); <sup>4</sup>: F-values are based on GLMs for a split-split plot design; numbers in parentheses are degrees of freedom; \* =  $p \leq 0.05$ , \*\* =  $p \leq 0.01$ , \*\*\* =  $p \leq 0.005$ ; interaction terms were not significant
